# Supplementary material for: Health-Related Quality Of Life And Clinical Outcome After Radiotherapy of Patients With Intracranial Meningioma
Source: Research Square preprint supplement (doi:10.21203/rs.3.rs-1211984/v1), 2022-01-03
Supplement: Supplementary file 1 [file 1efa4c0cae3fbb4c99535ece.docx]

**Supplementary Fig. S1**

**(a)**

**(b)**
