# Supplementary material for: Health-Related Quality Of Life And Clinical Outcome After Radiotherapy of Patients With Intracranial Meningioma
Source: Research Square preprint supplement (doi:10.21203/rs.3.rs-1211984/v1), 2022-01-03
Supplement: Supplementary file 2 [file c29eb2f753153e5e1adee91c.docx]

**Supplementary Fig. S2**
